# Supplementary material
Source: HighWire-hosted journal article supplement (https://bjsm.bmj.com/content/57/8/471)
Supplement: inline-supplementary-material-2 [file inline-supplementary-material-2.pdf]

**Supplementary File 2.****Table 1. Level of play.**

| Level of play | Definition                                                                                                                               |
|---------------|------------------------------------------------------------------------------------------------------------------------------------------|
| International | UEFA defines international football as a “ <i>match between two national teams composed of the best eligible players.</i> ” <sup>1</sup> |
| Elite         | the highest national football league <sup>2</sup>                                                                                        |
| Amateur       | any league below the highest national football league <sup>3</sup>                                                                       |

<sup>1</sup> <https://www.uefa.com/insideuefa/dictionary/index.html>

<sup>2</sup> Ekstrand et al (2011)

<sup>3</sup> By default based upon the definition provided by Ekstrand et al (2011)

Ekstrand J, Hägglund M, Fuller CW. Comparison of injuries sustained on artificial turf and grass by male and female elite football players. *Scand J Med Sci Sport.* 2011;21:824-832.

**Table 2. Location of injury.**

| <b>Main grouping</b> | <b>Category</b>                                                                                                                                                       |
|----------------------|-----------------------------------------------------------------------------------------------------------------------------------------------------------------------|
| Head and neck        | <ul style="list-style-type: none"><li>• Head and face</li><li>• Neck/cervical spine</li></ul>                                                                         |
| Upper limbs          | <ul style="list-style-type: none"><li>• Shoulder/clavicle</li><li>• Upper arm</li><li>• Elbow</li><li>• Forearm</li><li>• Wrist</li><li>• Hand/finger/thumb</li></ul> |
| Trunk                | <ul style="list-style-type: none"><li>• Sternum/ribs/upper back</li></ul>                                                                                             |
| Lower limbs          | <ul style="list-style-type: none"><li>• Hip/groin</li><li>• Thigh</li><li>• Knee</li><li>• Lower leg/Achilles tendon</li><li>• Ankle</li><li>• Foot/toe</li></ul>     |

**Table 3. Type of injury.**

| <b>Main grouping</b>              | <b>Category</b>                                                                                                                                      |
|-----------------------------------|------------------------------------------------------------------------------------------------------------------------------------------------------|
| Fractures and bone stress         | <ul style="list-style-type: none"><li>• Fracture</li><li>• Other bone injuries</li></ul>                                                             |
| Joint (non-bone) and ligaments    | <ul style="list-style-type: none"><li>• Dislocation/subluxation</li><li>• Sprain/ligament injury</li><li>• Lesion of meniscus or cartilage</li></ul> |
| Muscle and tendon                 | <ul style="list-style-type: none"><li>• Muscle rupture/tear/strains/cramps</li><li>• Tendon injury/rupture/tendinosis/bursitis</li></ul>             |
| Contusion                         | <ul style="list-style-type: none"><li>• Haematoma/contusion/bruise</li></ul>                                                                         |
| Laceration and skin lesion        | <ul style="list-style-type: none"><li>• Abrasion</li><li>• Laceration</li></ul>                                                                      |
| Central/peripheral nervous system | <ul style="list-style-type: none"><li>• Concussion (with or without loss of consciousness)</li><li>• Nerve injury</li></ul>                          |
| Other injuries                    | <ul style="list-style-type: none"><li>• Dental injuries</li><li>• Other injuries</li></ul>                                                           |

**Table 4. Severity of injury.**

| Level of severity | Definition                                                     |
|-------------------|----------------------------------------------------------------|
| Slight            | Injury causing absence from training and match play for <1 day |
| Minimal           | Injury causing absence 1-3 days from training and match play   |
| Mild              | Injury causing absence 4-7 days from training and match play   |
| Moderate          | Injury causing absence 8-28 days from training and match play  |
| Severe            | Injury causing absence >28 days from training and match play   |

All definitions were based upon those utilised by Ekstrand (2011)

Ekstrand J, Hägglund M, Fuller CW. Comparison of injuries sustained on artificial turf and grass by male and female elite football players. *Scand J Med Sci Sport*. 2011;21:824-832.
