# Supplementary material
Source: HighWire-hosted journal article supplement (https://bjsm.bmj.com/content/57/8/471)
Supplement: inline-supplementary-material-3 [file inline-supplementary-material-3.pdf]

**Supplementary File 3.****Table 1. Checklist of issues that should be included in reports of studies of football injuries (amended from Fuller et al, 2006)**

|                          | Study design | Duration of study |
|--------------------------|--------------|-------------------|
| McNoe & Chalmers (2010)  | ✓            | ✓                 |
| Jacobson & Tegner (2006) | ✓            | ✓                 |
| Ibikunle et al (2019)    | ✓            | ✓                 |
| Babwah (2014)            | ✓            | ✓                 |
| Nilstad et al (2014)     | ✓            | ✓                 |
| Giza et al (2012)        | ✓            | ✓                 |
| Ekstrand et al (2011)    | ✓            | ✓                 |
| Gaulrapp et al (2010)    | ✓            | ✓                 |
| Hägglund et al (2009)    | ✓            | ✓                 |
| Tegnander et al (2008)   | ✓            | ✓                 |
| Jacobson & Tegner (2007) | ✓            | ✓                 |
| Faude et al (2005)       | ✓            | ✓                 |
| Hägglund et al (2009)    | ✓            | ✓                 |
| Waldén et al (2007)      | ✓            | ✓                 |
| Junge & Dvorak (2007)    | ✓            | ✓                 |
| Junge et al (2006)       | ✓            | ✓                 |
| Junge et al (2004)       | ✓            | ✓                 |

**Table 2. Checklist of issues that should be included in reports of studies of football injuries (amended from Fuller et al, 2006)**

|                          | Study population       |                       |                 |                   |                      |                   |               |
|--------------------------|------------------------|-----------------------|-----------------|-------------------|----------------------|-------------------|---------------|
|                          | Organisational setting | Geographical location | Number of teams | Number of players | Age range of players | Gender of players | Level of play |
| McNoe & Chalmers (2010)  | ✓                      | ✓                     | ✗               | ✓                 | ✓                    | ✓                 | ✓             |
| Jacobson & Tegner (2006) | ✓                      | ✓                     | ✓               | ✓                 | ✓                    | ✓                 | ✓             |
| Ibikunle et al (2019)    | ✓                      | ✓                     | ✓               | ✓                 | ✓                    | ✓                 | ✓             |
| Babwah (2014)            | ✓                      | ✓                     | ✓               | ✗                 | ✗                    | ✓                 | ✓             |
| Nilstad et al (2014)     | ✓                      | ✓                     | ✓               | ✓                 | ✗                    | ✓                 | ✓             |
| Giza et al (2012)        | ✓                      | ✓                     | ✓               | ✓                 | ✗                    | ✓                 | ✓             |
| Ekstrand et al (2011)    | ✓                      | ✓                     | ✓               | ✓                 | ✓                    | ✓                 | ✓             |
| Gaulrapp et al (2010)    | ✓                      | ✓                     | ✓               | ✓                 | ✓                    | ✓                 | ✓             |
| Hägglund et al (2009)    | ✓                      | ✓                     | ✓               | ✓                 | ✓                    | ✓                 | ✓             |
| Tegnander et al (2008)   | ✓                      | ✓                     | ✓               | ✓                 | ✓                    | ✓                 | ✓             |
| Jacobson & Tegner (2007) | ✓                      | ✓                     | ✓               | ✓                 | ✓                    | ✓                 | ✓             |
| Faude et al (2005)       | ✓                      | ✓                     | ✓               | ✓                 | ✓                    | ✓                 | ✓             |
| Hägglund et al (2009)    | ✓                      | ✓                     | ✓               | ✓                 | ✓                    | ✓                 | ✓             |
| Waldén et al (2007)      | ✓                      | ✓                     | ✓               | ✓                 | ✗                    | ✓                 | ✓             |
| Junge & Dvorak (2007)    | ✓                      | ✓                     | ✗               | ✗                 | ✗                    | ✓                 | ✓             |
| Junge et al (2006)       | ✓                      | ✓                     | ✗               | ✗                 | ✗                    | ✓                 | ✓             |
| Junge et al (2004)       | ✓                      | ✓                     | ✗               | ✗                 | ✗                    | ✓                 | ✓             |

**Table 3. Checklist of issues that should be included in reports of studies of football injuries (amended from Fuller et al, 2006)**

|                          | Medical personnel involved | Frequency of recording injuries | Frequency of recording exposure data | Training to improve the quality of data collection |
|--------------------------|----------------------------|---------------------------------|--------------------------------------|----------------------------------------------------|
| McNoe & Chalmers (2010)  | *                          | ✓                               | ✓                                    | ✓                                                  |
| Jacobson & Tegner (2006) | ✓                          | ✓                               | ✓                                    | ✓                                                  |
| Ibikunle et al (2019)    | ✓                          | ✓                               | *                                    | ✓                                                  |
| Babwah (2014)            | ✓                          | ✓                               | *                                    | *                                                  |
| Nilstad et al (2014)     | ✓                          | ✓                               | ✓                                    | ✓                                                  |
| Giza et al (2012)        | ✓                          | ✓                               | *                                    | *                                                  |
| Ekstrand et al (2011)    | ✓                          | ✓                               | ✓                                    | ✓                                                  |
| Gaulrapp et al (2010)    | ✓                          | ✓                               | ✓                                    | *                                                  |
| Hägglund et al (2009)    | ✓                          | *                               | ✓                                    | ✓                                                  |
| Tegnander et al (2008)   | ✓                          | *                               | *                                    | *                                                  |
| Jacobson & Tegner (2007) | *                          | ✓                               | ✓                                    | ✓                                                  |
| Faude et al (2005)       | ✓                          | ✓                               | ✓                                    | *                                                  |
| Hägglund et al (2009)    | ✓                          | ✓                               | ✓                                    | ✓                                                  |
| Waldén et al (2007)      | ✓                          | ✓                               | ✓                                    | ✓                                                  |
| Junge & Dvorak (2007)    | ✓                          | ✓                               | ✓                                    | ✓                                                  |
| Junge et al (2006)       | ✓                          | ✓                               | ✓                                    | ✓                                                  |
| Junge et al (2004)       | ✓                          | ✓                               | ✓                                    | *                                                  |

**Table 4. Checklist of issues that should be included in reports of studies of football injuries (amended from Fuller et al, 2006)**

|                          | Definition of injury | Definition of exposure |
|--------------------------|----------------------|------------------------|
| McNoe & Chalmers (2010)  | ✓                    | ✓                      |
| Jacobson & Tegner (2006) | ✓                    | ✓                      |
| Ibikunle et al (2019)    | ✓                    | ✗                      |
| Babwah (2014)            | ✓                    | ✗                      |
| Nilstad et al (2014)     | ✓                    | ✓                      |
| Giza et al (2012)        | ✗                    | ✓                      |
| Ekstrand et al (2011)    | ✓                    | ✓                      |
| Gaulrapp et al (2010)    | ✓                    | ✗                      |
| Hägglund et al (2009)    | ✓                    | ✓                      |
| Tegnander et al (2008)   | ✗                    | ✓                      |
| Jacobson & Tegner (2007) | ✓                    | ✓                      |
| Faude et al (2005)       | ✓                    | ✓                      |
| Hägglund et al (2009)    | ✓                    | ✓                      |
| Waldén et al (2007)      | ✓                    | ✓                      |
| Junge & Dvorak (2007)    | ✓                    | ✓                      |
| Junge et al (2006)       | ✓                    | ✗                      |
| Junge et al (2004)       | ✓                    | ✓                      |

**Table 5. Checklist of issues that should be included in reports of studies of football injuries (amended from Fuller et al, 2006)**

|                          | Number of match exposures | Number of match injuries | Number of training exposures | Number of training injuries |
|--------------------------|---------------------------|--------------------------|------------------------------|-----------------------------|
| McNoe & Chalmers (2010)  | *                         | ✓                        | *                            | ✓                           |
| Jacobson & Tegner (2006) | *                         | ✓                        | *                            | ✓                           |
| Ibikunle et al (2019)    | ✓                         | ✓                        | ✓                            | ✓                           |
| Babwah (2014)            | ✓                         | ✓                        | *                            | *                           |
| Nilstad et al (2014)     | *                         | ✓                        | *                            | ✓                           |
| Giza et al (2012)        | *                         | *                        | *                            | *                           |
| Ekstrand et al (2011)    | ✓                         | ✓                        | ✓                            | ✓                           |
| Gaulrapp et al (2010)    | *                         | ✓                        | *                            | ✓                           |
| Hägglund et al (2009)    | ✓                         | ✓                        | ✓                            | ✓                           |
| Tegnander et al (2008)   | ✓                         | ✓                        | ✓                            | ✓                           |
| Jacobson & Tegner (2007) | ✓                         | ✓                        | ✓                            | ✓                           |
| Faude et al (2005)       | *                         | *                        | *                            | *                           |
| Hägglund et al (2009)    | ✓                         | ✓                        | ✓                            | ✓                           |
| Waldén et al (2007)      | ✓                         | ✓                        | ✓                            | ✓                           |
| Junge & Dvorak (2007)    | *                         | ✓                        | *                            | *                           |
| Junge et al (2006)       | ✓                         | ✓                        | *                            | *                           |
| Junge et al (2004)       | ✓                         | ✓                        | *                            | *                           |
