# Supplementary material
Source: HighWire-hosted journal article supplement (https://bjsm.bmj.com/content/57/8/471)
Supplement: inline-supplementary-material-5 [file inline-supplementary-material-5.pdf]

## Supplementary File 5.

**Table 1.** Women's elite football injury surveillance studies: overall, match, & training injury incidence rates (per 1,000 hours of exposure).

|                                        | Overall                | Match                   | Training              |
|----------------------------------------|------------------------|-------------------------|-----------------------|
| Ibikunle et al (2019)                  | 19.17 (14.40 to 23.94) | 55.56 (36.60 to 74.51)  | 10.98 (6.99 to 14.98) |
| Babwah (2014)                          |                        | 27.60 (17.00 to 38.20)* |                       |
| Nilstad et al (2014): self-reported    |                        | 18.60 (14.70 to 22.50)* | 3.70 (3.00 to 4.30)*  |
| Nilstad et al (2014): medical staff    |                        | 5.40 (3.80 to 7.00)*    | 2.20 (1.50 to 2.80)*  |
| Ekstrand et al (2011): grass           | 5.79 (4.28 to 7.29)    | 12.51 (8.53 to 16.49)   | 2.79 (1.54 to 4.04)   |
| Ekstrand et al (2011): artificial turf | 4.30 (3.65 to 4.96)    | 14.88 (11.32 to 18.45)  | 2.92 (2.33 to 3.48)   |
| Gaulrapp et al (2010)                  | 3.26 (2.85 to 3.67)    | 18.49 (15.58 to 21.40)  | 1.36 (1.08 to 1.64)   |
| Hägglund et al (2009)                  | 5.52 (4.90 to 6.15)    | 16.13 (13.29 to 18.97)  | 3.77 (3.21 to 4.32)   |
| Tegnander et al (2008)                 | 6.17 (5.29 to 7.05)    | 24.30 (19.35 to 29.34)  | 3.71 (2.98 to 4.44)   |
| Jacobson & Tegner (2007)               | 4.45 (3.89 to 5.03)    | 13.90 (11.37 to 16.43)  | 2.70 (2.06 to 3.34)   |
| Faude et al (2005)                     | 6.80 (5.94 to 7.66)    |                         |                       |

Values are IIR (95% CI).

Footnote: these data relate to the quantification of injury incidence rates using a **time-loss definition of injury**; blank cells indicate that these data were not reported or were not calculable (based upon reported data in the article).

\* Studies not included in the meta-analysis due to data required for statistical aggregation (e.g., number of injuries; total of exposure hours; standard error) not being reported or calculable.

**Table 2a.** Women's elite football injury surveillance studies: overall injury incidence rates (per 1,000 hours of exposure) stratified by location of injury.

|                                               | Head & Neck          | Upper Limbs          | Trunk                | Lower Limbs         |
|-----------------------------------------------|----------------------|----------------------|----------------------|---------------------|
| <b>Ibikunle et al (2019)</b>                  |                      |                      |                      |                     |
| <b>Babwah (2014)</b>                          |                      |                      |                      |                     |
| <b>Nilstad et al (2014): self-reported</b>    |                      |                      |                      |                     |
| <b>Nilstad et al (2014): medical staff</b>    |                      |                      |                      |                     |
| <b>Ekstrand et al (2011): grass</b>           | 0.61 (0.12 to 1.10)  | 0.30 (-0.04 to 0.65) | 0.20 (-0.08 to 0.48) | 4.67 (3.32 to 6.02) |
| <b>Ekstrand et al (2011): artificial turf</b> | 0.29 (-0.37 to 0.95) | 0.16 (-0.33 to 0.64) | 0.13 (-0.32 to 0.57) | 3.71 (1.33 to 6.09) |
| <b>Gaulrapp et al (2010)</b>                  |                      |                      |                      |                     |
| <b>Hägglund et al (2009)</b>                  | 0.22 (-0.47 to 0.91) | 0.11 (-0.38 to 0.60) | 0.50 (-0.54 to 1.53) | 5.13 (1.82 to 8.45) |
| <b>Tegnander et al (2008)</b>                 | 0.46 (0.22 to 0.70)  | 0.29 (0.10 to 0.49)  | 0.42 (0.19 to 0.66)  | 5.00 (4.21 to 5.79) |
| <b>Jacobson &amp; Tegner (2007)</b>           |                      | 0.08 (0.00 to 0.15)  |                      | 3.65 (3.14 to 4.16) |
| <b>Faude et al (2005)</b>                     | 0.45 (0.23 to 0.67)  | 0.37 (0.17 to 0.57)  | 0.51 (0.27 to 0.74)  | 5.47 (4.70 to 6.24) |

Values are IIR (95% CI).

Footnote: these data relate to the quantification of injury incidence rates using a **time-loss definition of injury**; blank cells indicate that these data were not reported or were not calculable (based upon reported data in the article).

**Table 2b.** Women's elite football injury surveillance studies: match injury incidence rates (per 1,000 hours of exposure) stratified by location of injury.

|                                        | Head & Neck         | Upper Limbs          | Trunk               | Lower Limbs           |
|----------------------------------------|---------------------|----------------------|---------------------|-----------------------|
| Ibikunle et al (2019)                  |                     |                      |                     |                       |
| Babwah (2014)                          |                     |                      |                     |                       |
| Nilstad et al (2014): self-reported    |                     |                      |                     |                       |
| Nilstad et al (2014): medical staff    |                     |                      |                     |                       |
| Ekstrand et al (2011): grass           | 1.32 (0.03 to 2.61) | 0.33 (-0.32 to 0.97) | 1.11 (0.14 to 2.08) | 10.86 (7.16 to 14.57) |
| Ekstrand et al (2011): artificial turf | 0.89 (0.02 to 1.76) | 0.22 (-0.21 to 0.66) | 0.00                | 12.44 (9.18 to 15.70) |
| Gaulrapp et al (2010)                  |                     |                      |                     |                       |
| Hägglund et al (2009)                  |                     |                      |                     |                       |
| Tegnander et al (2008)                 |                     |                      |                     |                       |
| Jacobson & Tegner (2007)               |                     | 0.24 (-0.09 to 0.57) |                     | 11.26 (8.99 to 13.54) |
| Faude et al (2005)                     |                     |                      |                     |                       |

Values are IIR (95% CI).

Footnote: these data relate to the quantification of injury incidence rates using a **time-loss definition of injury**; blank cells indicate that these data were not reported or were not calculable (based upon reported data in the article).

**Table 2c.** Women's elite football injury surveillance studies: training injury incidence rates (per 1,000 hours of exposure) stratified by location of injury.

|                                        | Head & Neck          | Upper Limbs          | Trunk                | Lower Limbs         |
|----------------------------------------|----------------------|----------------------|----------------------|---------------------|
| Ibikunle et al (2019)                  |                      |                      |                      |                     |
| Babwah (2014)                          |                      |                      |                      |                     |
| Nilstad et al (2014): self-reported    |                      |                      |                      |                     |
| Nilstad et al (2014): medical staff    |                      |                      |                      |                     |
| Ekstrand et al (2011): grass           | 0.29 (-0.11 to 0.70) | 0.29 (-0.11 to 0.70) | 0.29 (-0.11 to 0.70) | 1.91 (0.87 to 2.95) |
| Ekstrand et al (2011): artificial turf | 0.21 (0.05 to 0.36)  | 0.15 (0.02 to 0.28)  | 0.00                 | 2.55 (2.00 to 3.09) |
| Gaulrapp et al (2010)                  |                      |                      |                      |                     |
| Hägglund et al (2009)                  |                      |                      |                      |                     |
| Tegnander et al (2008)                 |                      |                      |                      |                     |
| Jacobson & Tegner (2007)               |                      | 0.04 (-0.02 to 0.11) |                      | 2.23 (1.79 to 2.67) |
| Faude et al (2005)                     |                      |                      |                      |                     |

Values are IIR (95% CI).

Footnote: these data relate to the quantification of injury incidence rates using a **time-loss definition of injury**; blank cells indicate that these data were not reported or were not calculable (based upon reported data in the article).

**Table 3a.** Women's elite football injury surveillance studies: overall injury incidence rates (per 1,000 hours of exposure) stratified by type of injury.

|                                        | Fracture & Bone Stress | Joint & Ligaments   | Muscle & Tendon      | Contusion            | Laceration & Skin Lesion | CNS/PNS              | Other Injuries       |
|----------------------------------------|------------------------|---------------------|----------------------|----------------------|--------------------------|----------------------|----------------------|
| Ibikunle et al (2019)                  | 2.47 (0.76 to 4.19)    | 6.80 (3.96 to 9.65) | 8.08 (4.95 to 11.13) | 0.00                 | 1.24 (0.02 to 2.45)      | 0.31 (-0.30 to 0.92) | 0.31 (-0.30 to 0.92) |
| Babwah (2014)                          |                        |                     |                      |                      |                          |                      |                      |
| Nilstad et al (2014): self-reported    |                        |                     |                      |                      |                          |                      |                      |
| Nilstad et al (2014): medical staff    |                        |                     |                      |                      |                          |                      |                      |
| Ekstrand et al (2011): grass           | 0.20 (-0.08 to 0.48)   | 1.62 (0.83 to 2.42) | 2.03 (1.14 to 2.92)  | 1.22 (0.53 to 1.91)  | 0.00                     | 0.41 (0.01 to 0.80)  | 0.30 (-0.04 to 0.65) |
| Ekstrand et al (2011): artificial turf | 0.20 (-0.34 to 0.71)   | 1.76 (0.12 to 0.34) | 1.30 (-0.11 to 2.70) | 0.70 (-0.33 to 1.73) | 0.03 (-0.17 to 0.22)     | 0.18 (-0.34 to 0.71) | 0.13 (-0.32 to 0.57) |
| Gaulrapp et al (2010)                  |                        |                     |                      |                      |                          |                      |                      |
| Hägglund et al (2009)                  |                        |                     |                      |                      |                          |                      |                      |
| Tegnander et al (2008)                 |                        |                     |                      |                      |                          |                      |                      |
| Jacobson & Tegner (2007)               |                        |                     |                      |                      |                          |                      |                      |
| Faude et al (2005)                     |                        |                     |                      |                      |                          |                      |                      |

Values are IIR (95% CI).

Footnote: these data relate to the quantification of injury incidence rates using a **time-loss definition of injury**; blank cells indicate that these data were not reported or were not calculable (based upon reported data in the article).

**Table 3b.** Women's elite football injury surveillance studies: match injury incidence rates (per 1,000 hours of exposure) stratified by type of injury.

|                                        | Fracture & Bone Stress | Joint & Ligaments   | Muscle & Tendon     | Contusion           | Laceration & Skin Lesion | CNS/PNS              | Other Injuries      |
|----------------------------------------|------------------------|---------------------|---------------------|---------------------|--------------------------|----------------------|---------------------|
| Ibikunle et al (2019)                  |                        |                     |                     |                     |                          |                      |                     |
| Babwah (2014)                          |                        |                     |                     |                     |                          |                      |                     |
| Nilstad et al (2014): self-reported    |                        |                     |                     |                     |                          |                      |                     |
| Nilstad et al (2013): medical staff    |                        |                     |                     |                     |                          |                      |                     |
| Ekstrand et al (2011): grass           | 0.33 (-0.32 to 0.97)   | 4.94 (2.44 to 7.44) | 2.96 (1.03 to 4.90) | 3.23 (1.25 to 5.33) | 0.00                     | 0.99 (-0.13 to 2.10) | 0.00                |
| Ekstrand et al (2011): artificial turf | 0.00                   | 5.55 (3.38 to 7.73) | 3.55 (1.81 to 5.30) | 3.55 (1.81 to 5.30) | 0.22 (-0.21 to 0.66)     | 0.89 (0.49 to 1.29)  | 0.89 (0.49 to 1.29) |
| Gaulrapp et al (2010)                  |                        |                     |                     |                     |                          |                      |                     |
| Häggglund et al (2009)                 |                        |                     |                     |                     |                          |                      |                     |
| Tegnander et al (2008)                 |                        |                     |                     |                     |                          |                      |                     |
| Jacobson & Tegner (2007)               |                        |                     |                     |                     |                          |                      |                     |
| Faude et al (2005)                     |                        |                     |                     |                     |                          |                      |                     |

Values are IIR (95% CI).

Footnote: these data relate to the quantification of injury incidence rates using a **time-loss definition of injury**; blank cells indicate that these data were not reported or were not calculable (based upon reported data in the article).

**Table 3c.** Women's elite football injury surveillance studies: training injury incidence rates (per 1,000 hours of exposure) stratified by type of injury.

|                                        | Fracture & Bone Stress | Joint & Ligaments    | Muscle & Tendon     | Contusion            | Laceration & Skin Lesion | CNS/PNS              | Other Injuries       |
|----------------------------------------|------------------------|----------------------|---------------------|----------------------|--------------------------|----------------------|----------------------|
| Ibikunle et al (2019)                  |                        |                      |                     |                      |                          |                      |                      |
| Babwah (2014)                          |                        |                      |                     |                      |                          |                      |                      |
| Nilstad et al (2014): self-reported    |                        |                      |                     |                      |                          |                      |                      |
| Nilstad et al (2013): medical staff    |                        |                      |                     |                      |                          |                      |                      |
| Ekstrand et al (2011): grass           | 0.15 (-0.14 to 0.43)   | 0.15 (-0.14 to 0.43) | 1.62 (0.66 to 2.57) | 0.29 (-0.11 to 0.70) | 0.00                     | 0.15 (-0.14 to 0.43) | 0.44 (-0.06 to 0.94) |
| Ekstrand et al (2011): artificial turf | 0.21 (0.05 to 0.36)    | 1.26 (0.89 to 1.64)  | 1.00 (0.66 to 1.33) | 0.32 (0.13 to 0.51)  | 0.00                     | 0.09 (-0.01 to 0.19) | 0.03 (-0.03 to 0.09) |
| Gaulrapp et al (2010)                  |                        |                      |                     |                      |                          |                      |                      |
| Häggglund et al (2009)                 |                        |                      |                     |                      |                          |                      |                      |
| Tegnander et al (2008)                 |                        |                      |                     |                      |                          |                      |                      |
| Jacobson & Tegner (2007)               |                        |                      |                     |                      |                          |                      |                      |
| Faude et al (2005)                     |                        |                      |                     |                      |                          |                      |                      |

Values are IIR (95% CI).

Footnote: these data relate to the quantification of injury incidence rates using a **time-loss definition of injury**; blank cells indicate that these data were not reported or were not calculable (based upon reported data in the article).

**Table 4a.** Women's elite football injury surveillance studies: overall injury incidence rates (per 1,000 hours of exposure) stratified by severity of injury.

|                                        | Slight (<1 day)      | Minimal (1-3 days)  | Mild (4-7 days)     | Moderate (8-28 days) | Severe (>28 days)   |
|----------------------------------------|----------------------|---------------------|---------------------|----------------------|---------------------|
| Ibikunle et al (2019)                  |                      |                     |                     |                      |                     |
| Babwah (2014)                          |                      |                     |                     |                      |                     |
| Nilstad et al (2014): self-reported    |                      |                     |                     |                      |                     |
| Nilstad et al (2013): medical staff    |                      |                     |                     |                      |                     |
| Ekstrand et al (2011): grass           | 0.00                 | 1.83 (0.98 to 2.67) | 1.42 (0.68 to 2.17) | 1.62 (0.83 to 2.42)  | 0.91 (0.31 to 1.51) |
| Ekstrand et al (2011): artificial turf | 0.03 (-0.02 to 0.08) | 1.27 (0.92 to 1.63) | 1.25 (0.89 to 1.60) | 1.27 (0.92 to 1.63)  | 0.49 (0.27 to 0.71) |
| Gaulrapp et al (2010)                  |                      |                     |                     |                      |                     |
| Häggglund et al (2009)                 |                      | 1.40 (1.09 to 1.72) | 1.55 (1.22 to 1.88) | 1.88 (1.52 to 2.25)  | 0.68 (0.46 to 0.90) |
| Tegnander et al (2008)                 |                      |                     |                     |                      |                     |
| Jacobson & Tegner (2007)               |                      | 0.77 (0.54 to 1.01) | 0.98 (0.71 to 1.24) | 1.73 (1.38 to 2.08)  | 0.98 (0.71 to 1.24) |
| Faude et al (2005)                     |                      |                     |                     |                      |                     |

Values are IIR (95% CI).

Footnote: these data relate to the quantification of injury incidence rates using a **time-loss definition of injury**; blank cells indicate that these data were not reported or were not calculable (based upon reported data in the article).

**Table 4b.** Women's elite football injury surveillance studies: match injury incidence rates (per 1,000 hours of exposure) stratified by severity of injury.

|                                        | Slight (<1 day) | Minimal (1-3 days)  | Mild (4-7 days)     | Moderate (8-28 days) | Severe (>28 days)   |
|----------------------------------------|-----------------|---------------------|---------------------|----------------------|---------------------|
| Ibikunle et al (2019)                  |                 |                     |                     |                      |                     |
| Babwah (2014)                          |                 |                     |                     |                      |                     |
| Nilstad et al (2014): self-reported    |                 |                     |                     |                      |                     |
| Nilstad et al (2013): medical staff    |                 |                     |                     |                      |                     |
| Ekstrand et al (2011): grass           | 0.00            | 3.95 (1.72 to 6.18) | 2.63 (0.81 to 4.46) | 2.96 (1.03 to 4.90)  | 2.96 (1.03 to 4.90) |
| Ekstrand et al (2011): artificial turf | 0.00            | 4.89 (2.84 to 6.93) | 4.00 (2.15 to 5.85) | 4.44 (2.50 to 6.39)  | 1.55 (0.40 to 2.71) |
| Gaulrapp et al (2010)                  |                 |                     |                     |                      |                     |
| Hägglund et al (2009)                  |                 |                     |                     |                      |                     |
| Tegnander et al (2008)                 |                 |                     |                     |                      |                     |
| Jacobson & Tegner (2007)               |                 |                     |                     |                      |                     |
| Faude et al (2005)                     |                 |                     |                     |                      |                     |

Values are IIR (95% CI).

Footnote: these data relate to the quantification of injury incidence rates using a **time-loss definition of injury**; blank cells indicate that these data were not reported or were not calculable (based upon reported data in the article).

**Table 4c.** Women's elite football injury surveillance studies: training injury incidence rates (per 1,000 hours of exposure) stratified by severity of injury.

|                                        | Slight (<1 day)      | Minimal (1-3 days)  | Mild (4-7 days)     | Moderate (8-28 days) | Severe (>28 days)   |
|----------------------------------------|----------------------|---------------------|---------------------|----------------------|---------------------|
| Ibikunle et al (2019)                  |                      |                     |                     |                      |                     |
| Babwah (2014)                          |                      |                     |                     |                      |                     |
| Nilstad et al (2014): self-reported    |                      |                     |                     |                      |                     |
| Nilstad et al (2013): medical staff    |                      |                     |                     |                      |                     |
| Ekstrand et al (2011): grass           | 0.00                 | 0.88 (0.18 to 1.59) | 0.88 (0.18 to 1.59) | 1.03 (0.27 to 1.79)  | 0.00                |
| Ekstrand et al (2011): artificial turf | 0.03 (-0.03 to 0.08) | 0.79 (0.49 to 1.09) | 0.88 (0.57 to 1.20) | 0.85 (0.54 to 1.16)  | 0.35 (0.15 to 0.55) |
| Gaulrapp et al (2010)                  |                      |                     |                     |                      |                     |
| Häggglund et al (2009)                 |                      |                     |                     |                      |                     |
| Tegnander et al (2008)                 |                      |                     |                     |                      |                     |
| Jacobson & Tegner (2007)               |                      |                     |                     |                      |                     |
| Faude et al (2005)                     |                      |                     |                     |                      |                     |

Values are IIR (95% CI).

Footnote: these data relate to the quantification of injury incidence rates using a **time-loss definition of injury**; blank cells indicate that these data were not reported or were not calculable (based upon reported data in the article).

**Table 5.** Women's international football injury surveillance studies: overall, match, & training injury incidence rates (per 1,000 hours of exposure).

|                                                          | Overall               | Match                  | Training             |
|----------------------------------------------------------|-----------------------|------------------------|----------------------|
| Hägglund et al (2009)<br>U-19 European Championship 2006 | 13.47 (7.97 to 18.98) | 28.17 (13.41 to 42.92) | 7.44 (2.58 to 12.30) |
| Hägglund et al (2009)<br>U-19 European Championship 2007 | 8.53 (3.70 to 13.35)  | 21.96 (8.98 to 34.93)  | 1.10 (-1.06 to 3.27) |
| Hägglund et al (2009)<br>U-19 European Championship 2008 | 4.89 (1.50 to 8.28)   | 11.67 (2.33 to 21.01)  | 1.78 (-0.69 to 4.26) |
| Junge et al (2004)<br>World Cup 1999                     |                       |                        |                      |
| Junge & Dvorak (2007)<br>World Cup 2003                  |                       |                        |                      |
| Junge et al (2004)<br>Olympic Games 2000                 |                       |                        |                      |
| Junge et al (2006)<br>Olympic Games 2004                 |                       |                        |                      |
| Junge & Dvorak (2007)<br>U-19 World Championship 2002    |                       |                        |                      |
| Junge & Dvorak (2007)<br>U-19 World Championship 2004    |                       |                        |                      |
| Junge & Dvorak (2007)<br>U-20 World Championship 2006    |                       |                        |                      |
| Waldén (2007)<br>European Championship 2005              | 9.88 (5.32 to 14.45)  | 29.59 (14.61 to 44.56) | 2.28 (-0.30 to 4.87) |

Values are IIR (95% CI).

Footnote: these data relate to the quantification of injury incidence rates using a **time-loss definition of injury**; blank cells indicate that these data were not reported or were not calculable (based upon reported data in the article).

**Table 6.** Women's international football injury surveillance studies: overall, match, & training injury incidence rates (per 1,000 hours of exposure).

|                                                          | Overall | Match                   | Training |
|----------------------------------------------------------|---------|-------------------------|----------|
| Hägglund et al (2009)<br>U-19 European Championship 2006 |         |                         |          |
| Hägglund et al (2009)<br>U-19 European Championship 2007 |         |                         |          |
| Hägglund et al (2009)<br>U-19 European Championship 2008 |         |                         |          |
| Junge et al (2004)<br>World Cup 1999                     |         | 38.70 (24.83 to 52.49)  |          |
| Junge & Dvorak (2007)<br>World Cup 2003                  |         | 52.00 (38.00 to 66.00)  |          |
| Junge et al (2004)<br>Olympic Games 2000                 |         | 64.64 (42.25 to 87.05)  |          |
| Junge et al (2006)<br>Olympic Games 2004                 |         | 70.00 (50.00 to 90.00)  |          |
| Junge & Dvorak (2007)<br>U-19 World Championship 2002    |         | 85.00 (65.00 to 105.00) |          |
| Junge & Dvorak (2007)<br>U-19 World Championship 2004    |         | 68.00 (50.00 to 85.00)  |          |
| Junge & Dvorak (2007)<br>U-20 World Championship 2006    |         | 89.00 (71.00 to 107.00) |          |
| Waldén (2007)<br>European Championship 2005              |         |                         |          |

Values are IIR (95% CI).

Footnote: these data relate to the quantification of injury incidence rates using an **all physical complaints definition of injury**; blank cells indicate that these data were not reported or were not calculable (based upon reported data in the article).

**Table 7.** Women's international football injury surveillance studies: match injury incidence rates (per 1,000 hours of exposure) stratified by location of injury.

|                                                          | Head & Neck            | Upper Limbs           | Trunk                | Lower Limbs            |
|----------------------------------------------------------|------------------------|-----------------------|----------------------|------------------------|
| Hägglund et al (2009)<br>U-19 European Championship 2006 |                        |                       |                      |                        |
| Hägglund et al (2009)<br>U-19 European Championship 2007 |                        |                       |                      |                        |
| Hägglund et al (2009)<br>U-19 European Championship 2008 |                        |                       |                      |                        |
| Junge et al (2004)<br>World Cup 1999                     |                        |                       |                      |                        |
| Junge & Dvorak (2007)<br>World Cup 2003                  |                        |                       |                      |                        |
| Junge et al (2004)<br>Olympic Games 2000                 | 16.16 (4.96 to 27.36)  | 6.06 (-0.80 to 12.92) | 2.02 (-1.94 to 5.98) | 34.34 (18.02 to 50.67) |
| Junge et al (2006)<br>Olympic Games 2004                 | 10.88 (-1.68 to 23.44) | 4.66 (-0.61 to 9.94)  | 6.22 (0.12 to 12.31) | 48.17 (31.22 to 65.13) |
| Junge & Dvorak (2007)<br>U-19 World Championship 2002    |                        |                       |                      |                        |
| Junge & Dvorak (2007)<br>U-19 World Championship 2004    |                        |                       |                      |                        |
| Junge & Dvorak (2007)<br>U-20 World Championship 2006    |                        |                       |                      |                        |
| Waldén (2007)<br>European Championship 2005              |                        |                       |                      |                        |

Values are IIR (95% CI).

Footnote: these data relate to the quantification of injury incidence rates using an **all physical complaints definition of injury**; blank cells indicate that these data were not reported or were not calculable (based upon reported data in the article).

**Table 8.** Women's international football injury surveillance studies: match injury incidence rates (per 1,000 hours of exposure) stratified by type of injury.

|                                                          | Fracture & Bone Stress | Joint & Ligaments      | Muscle & Tendon       | Contusion              | Laceration & Skin Lesion | CNS/PNS              | Other Injuries        |
|----------------------------------------------------------|------------------------|------------------------|-----------------------|------------------------|--------------------------|----------------------|-----------------------|
| Hägglund et al (2009)<br>U-19 European Championship 2006 |                        |                        |                       |                        |                          |                      |                       |
| Hägglund et al (2009)<br>U-19 European Championship 2007 |                        |                        |                       |                        |                          |                      |                       |
| Hägglund et al (2009)<br>U-19 European Championship 2008 |                        |                        |                       |                        |                          |                      |                       |
| Junge et al (2004)<br>World Cup 1999                     |                        |                        |                       |                        |                          |                      |                       |
| Junge & Dvorak (2007)<br>World Cup 2003                  |                        |                        |                       |                        |                          |                      |                       |
| Junge et al (2004)<br>Olympic Games 2000                 | 0.00                   | 8.08 (0.16 to 16.00)   | 16.16 (4.96 to 27.36) | 4.04 (-1.56 to 9.64)   | 8.08 (0.16 to 16.00)     | 4.04 (-1.56 to 9.64) | 0.00                  |
| Junge et al (2006)<br>Olympic Games 2004                 | 1.55 (-1.49 to 4.60)   | 23.31 (11.51 to 35.11) | 6.21 (0.12 to 12.31)  | 24.85 (12.68 to 27.05) | 0.00                     | 3.11 (1.20 to 7.42)  | 10.87 (2.82 to 18.94) |
| Junge & Dvorak (2007)<br>U-19 World Championship 2002    |                        |                        |                       |                        |                          |                      |                       |
| Junge & Dvorak (2007)<br>U-19 World Championship 2004    |                        |                        |                       |                        |                          |                      |                       |
| Junge & Dvorak (2007)<br>U-20 World Championship 2006    |                        |                        |                       |                        |                          |                      |                       |
| Waldén (2007)<br>European Championship 2005              |                        |                        |                       |                        |                          |                      |                       |

Values are IIR (95% CI).

Footnote: these data relate to the quantification of injury incidence rates using an **all physical complaints definition of injury**; blank cells indicate that these data were not reported or were not calculable (based upon reported data in the article).

**Table 9.** Women's international football injury surveillance studies: overall injury incidence rates (per 1,000 hours of exposure) stratified by severity of injury.

|                                                          | Slight (<1 day)      | Minimal (1-3 days)   | Mild (4-7 days)      | Moderate (8-28 days) | Severe (>28 days)    |
|----------------------------------------------------------|----------------------|----------------------|----------------------|----------------------|----------------------|
| Hägglund et al (2009)<br>U-19 European Championship 2006 | 2.34 (0.05 to 4.64)  | 7.62 (3.48 to 11.76) | 1.17 (-0.45 to 2.80) | 1.17 (-0.45 to 2.80) | 1.17 (-0.45 to 2.80) |
| Hägglund et al (2009)<br>U-19 European Championship 2007 | 0.00                 | 4.98 (1.29 to 8.66)  | 0.71 (-0.68 to 2.10) | 2.13 (-0.27 to 4.55) | 0.71 (-0.68 to 2.10) |
| Hägglund et al (2009)<br>U-19 European Championship 2008 | 0.00                 | 3.06 (0.38 to 5.74)  | 0.00                 | 1.22 (0.47 to 2.92)  | 0.61 (-0.59 to 1.81) |
| Junge et al (2004)<br>World Cup 1999                     |                      |                      |                      |                      |                      |
| Junge & Dvorak (2007)<br>World Cup 2003                  |                      |                      |                      |                      |                      |
| Junge et al (2004)<br>Olympic Games 2000                 |                      |                      |                      |                      |                      |
| Junge et al (2006)<br>Olympic Games 2004                 |                      |                      |                      |                      |                      |
| Junge & Dvorak (2007)<br>U-19 World Championship 2002    |                      |                      |                      |                      |                      |
| Junge & Dvorak (2007)<br>U-19 World Championship 2004    |                      |                      |                      |                      |                      |
| Junge & Dvorak (2007)<br>U-20 World Championship 2006    |                      |                      |                      |                      |                      |
| Waldén (2007)<br>European Championship 2005              | 1.65 (-0.22 to 3.51) | 4.39 (1.35 to 7.44)  | 0.00                 | 2.20 (-2.11 to 6.50) | 1.65 (-0.22 to 3.51) |

Values are IIR (95% CI).

Footnote: these data relate to the quantification of injury incidence rates using a **time-loss definition of injury**; blank cells indicate that these data were not reported or were not calculable (based upon reported data in the article).

**Table 10.** Women's international football injury surveillance studies: match injury incidence rates (per 1,000 hours of exposure) stratified by severity of injury.

|                                                          | Slight (<1 day)        | Minimal (1-3 days)    | Mild (4-7 days)      | Moderate (8-28 days) | Severe (>28 days)    |
|----------------------------------------------------------|------------------------|-----------------------|----------------------|----------------------|----------------------|
| Hägglund et al (2009)<br>U-19 European Championship 2006 |                        |                       |                      |                      |                      |
| Hägglund et al (2009)<br>U-19 European Championship 2007 |                        |                       |                      |                      |                      |
| Hägglund et al (2009)<br>U-19 European Championship 2008 |                        |                       |                      |                      |                      |
| Junge et al (2004)<br>World Cup 1999                     |                        |                       |                      |                      |                      |
| Junge & Dvorak (2007)<br>World Cup 2003                  |                        |                       |                      |                      |                      |
| Junge et al (2004)<br>Olympic Games 2000                 | 34.34 (18.02 to 50.67) | 12.12 (2.42 to 21.82) | 4.04 (-1.56 to 9.64) | 8.08 (0.16 to 16.00) | 0.00                 |
| Junge et al (2006)<br>Olympic Games 2004                 | 32.63 (18.68 to 46.59) | 15.54 (5.91 to 25.18) | 7.77 (0.96 to 14.58) | 4.66 (-0.61 to 9.94) | 1.55 (-1.49 to 4.60) |
| Junge & Dvorak (2007)<br>U-19 World Championship 2002    |                        |                       |                      |                      |                      |
| Junge & Dvorak (2007)<br>U-19 World Championship 2004    |                        |                       |                      |                      |                      |
| Junge & Dvorak (2007)<br>U-20 World Championship 2006    |                        |                       |                      |                      |                      |
| Waldén (2007)<br>European Championship 2005              |                        |                       |                      |                      |                      |

Values are IIR (95% CI).

Footnote: these data relate to the quantification of injury incidence rates using an **all physical complaints definition of injury**; blank cells indicate that these data were not reported or were not calculable (based upon reported data in the article).
