# Supplementary material
Source: HighWire-hosted journal article supplement (https://bjsm.bmj.com/content/57/8/471)
Supplement: inline-supplementary-material-6 [file inline-supplementary-material-6.pdf]

## Supplementary File 6.

**Table 1.** Women's elite football: overall, match, & training injury incidence rates (per 1,000 hour of exposure) stratified by severity of injury.

| Description |          |                   |          |      | Poisson regression meta-analysis |   |                        |               |                 |       |        |
|-------------|----------|-------------------|----------|------|----------------------------------|---|------------------------|---------------|-----------------|-------|--------|
| Level       | Setting  | Injury Definition | Severity | Days | Model                            | k | Summary Incidence Rate | 95% CI        | $\chi^2_{Wald}$ | $I^2$ | $I^2$  |
| Elite       | Overall  | Time-loss         | Slight   | <1   | Fixed                            | 2 | 0.02                   | 0.003 to 0.15 | 0.01 (p=0.99)   | NA    | NA     |
| Elite       | Overall  | Time-loss         | Minimal  | 1-3  | Random                           | 4 | 1.21                   | 0.91 to 1.62  | 13.06 (p<0.01)  | 0.06  | 71.40% |
| Elite       | Overall  | Time-loss         | Mild     | 4-7  | Random                           | 4 | 1.26                   | 1.04 to 1.54  | 7.01 (p=0.07)   | 0.02  | 45.13% |
| Elite       | Overall  | Time-loss         | Moderate | 8-28 | Random                           | 4 | 1.64                   | 1.40 to 1.92  | 5.25 (p=0.15)   | 0.01  | 30.24% |
| Elite       | Overall  | Time-loss         | Severe   | >28  | Random                           | 4 | 0.74                   | 0.56 to 0.97  | 7.53 (p=0.06)   | 0.04  | 48.52% |
| Elite       | Match    | Time-loss         | Slight   | <1   | Fixed                            | 2 | NA*                    | NA*           | NA              | NA    | NA     |
| Elite       | Match    | Time-loss         | Minimal  | 1-3  | Fixed                            | 2 | 4.51                   | 3.22 to 6.31  | 0.35 (p=0.55)   | NA    | NA     |
| Elite       | Match    | Time-loss         | Mild     | 4-7  | Fixed                            | 2 | 3.45                   | 2.35 to 5.06  | 0.97 (p=0.33)   | NA    | NA     |
| Elite       | Match    | Time-loss         | Moderate | 8-28 | Fixed                            | 2 | 3.85                   | 2.67 to 5.54  | 1.02 (p=0.31)   | NA    | NA     |
| Elite       | Match    | Time-loss         | Severe   | >28  | Fixed                            | 2 | 2.12                   | 1.30 to 3.46  | 1.64 (p=0.20)   | NA    | NA     |
| Elite       | Training | Time-loss         | Slight   | <1   | Fixed                            | 2 | 0.02                   | 0.003 to 0.17 | 0.01 (p=0.99)   | NA    | NA     |
| Elite       | Training | Time-loss         | Minimal  | 1-3  | Fixed                            | 2 | 0.81                   | 0.57 to 1.14  | 0.05 (p=0.82)   | NA    | NA     |
| Elite       | Training | Time-loss         | Mild     | 4-7  | Fixed                            | 2 | 0.88                   | 0.64 to 1.22  | 0.01 (p=0.99)   | NA    | NA     |
| Elite       | Training | Time-loss         | Moderate | 8-28 | Fixed                            | 2 | 0.88                   | 0.64 to 1.22  | 0.20 (p=0.66)   | NA    | NA     |
| Elite       | Training | Time-loss         | Severe   | >28  | Fixed                            | 2 | 0.32                   | 0.19 to 0.55  | 0.01 (p=0.99)   | NA    | NA     |

\*Zero events reported in studies included in this meta-analysis, thus yielding no summary effect estimate.

**Table 2.** Women's international football: overall injury incidence rates (per 1,000 hour of exposure) stratified by severity of injury.

| Description   |         |                   |          |      | Poisson regression meta-analysis |   |                        |              |                 |
|---------------|---------|-------------------|----------|------|----------------------------------|---|------------------------|--------------|-----------------|
| Level         | Setting | Injury Definition | Severity | Days | Model                            | k | Summary Incidence Rate | 95% CI       | $\chi^2_{Wald}$ |
| International | Overall | Time-loss         | Slight   | <1   | Fixed                            | 4 | NA*                    | NA           | NA              |
| International | Overall | Time-loss         | Minimal  | 1-3  | Fixed                            | 4 | 5.02                   | 3.57 to 7.07 | 3.53 (p=0.32)   |
| International | Overall | Time-loss         | Mild     | 4-7  | Fixed                            | 4 | NA*                    | NA           | NA              |
| International | Overall | Time-loss         | Moderate | 8-28 | Fixed                            | 4 | 1.67                   | 0.93 to 3.02 | 0.91 (p=0.83)   |
| International | Overall | Time-loss         | Severe   | >28  | Fixed                            | 4 | 1.07                   | 0.51 to 2.23 | 1.02 (p=0.80)   |

\*Zero events and zero exposure hours reported by  $\geq 1$  study included in these meta-analyses, thus yielding no summary effect estimate.

**Table 3.** Women's international football: match injury incidence rates (per 1,000 hour of exposure) stratified by severity of injury.

| Description   |         |                         |          |      | Poisson regression meta-analysis |   |                        |                |                 |
|---------------|---------|-------------------------|----------|------|----------------------------------|---|------------------------|----------------|-----------------|
| Level         | Setting | Injury Definition       | Severity | Days | Model                            | k | Summary Incidence Rate | 95% CI         | $\chi^2_{Wald}$ |
| International | Match   | All physical complaints | Slight   | <1   | Fixed                            | 2 | 33.38                  | 24.29 to 45.87 | 0.02 (p=0.88)   |
| International | Match   | All physical complaints | Minimal  | 1-3  | Fixed                            | 2 | 14.05                  | 8.61 to 22.94  | 0.23 (p=0.63)   |
| International | Match   | All physical complaints | Mild     | 4-7  | Fixed                            | 2 | 6.15                   | 2.93 to 12.90  | 0.61 (p=0.43)   |
| International | Match   | All physical complaints | Moderate | 8-28 | Fixed                            | 2 | 6.15                   | 2.93 to 12.90  | 0.52 (p=0.47)   |
| International | Match   | All physical complaints | Severe   | >28  | Fixed                            | 2 | 0.88                   | 0.12 to 6.24   | 0.01 (p=0.99)   |
