# Supplementary material
Source: HighWire-hosted journal article supplement (https://bjsm.bmj.com/content/57/8/471)
Supplement: inline-supplementary-material-7 [file inline-supplementary-material-7.pdf]

## Supplementary File 7. Injury definitions used across included studies.

Table 1. Women's amateur football studies

|                                     | Injury definition (from article)                                                                                                                                                                             | Authors' interpretation/classification of injury definition | Data reported in article |                         |                     |
|-------------------------------------|--------------------------------------------------------------------------------------------------------------------------------------------------------------------------------------------------------------|-------------------------------------------------------------|--------------------------|-------------------------|---------------------|
|                                     |                                                                                                                                                                                                              |                                                             | Time-loss                | All Physical Complaints | Hybrid <sup>a</sup> |
| <b>McNoe &amp; Chalmers (2010)</b>  | "an event occurring during a soccer match or training session that required medical attention (including self-treatment) or caused the player to miss at least one scheduled match or team training session" | Hybrid <sup>a</sup>                                         | ✘                        | ✘                       | ✔                   |
| <b>Jacobson &amp; Tegner (2006)</b> | "damage to the body sustained during practice or game session causing absence from at least the following practice and/or game session"                                                                      | Time-loss                                                   | ✔                        | ✘                       | ✘                   |

<sup>a</sup> Does not satisfy the criteria for classification as **all physical complaints** or **time-loss**

**Table 2. Women's elite football studies**

|                              | Injury definition (from article)                                                                                                                                                             | Our classification of injury definition | Data reported in article |                         |        |
|------------------------------|----------------------------------------------------------------------------------------------------------------------------------------------------------------------------------------------|-----------------------------------------|--------------------------|-------------------------|--------|
|                              |                                                                                                                                                                                              |                                         | Time-loss                | All Physical Complaints | Hybrid |
| <b>Ibikunle et al (2019)</b> | "any event occurring during a scheduled training session or a match, resulting in the player leaving that session/match or missing a subsequent session/match"                               | Time-loss                               | ✓                        | ✗                       | ✗      |
| <b>Babwah (2014)</b>         | No definition provided                                                                                                                                                                       | Time-loss<br>(article page 330)         | ✓                        | ✓                       | ✗      |
| <b>Nilstad et al (2014)</b>  | "an injury was recorded if it resulted in a player being unable to take a full part in future football training or match play at least 1 day beyond the occurrence of the injury"            | Time-loss                               | ✓                        | ✗                       | ✗      |
| <b>Giza et al (2012)</b>     | "those conditions which were reported to and evaluated by the team physician or athletic trainer"                                                                                            | All physical complaints                 | ✗                        | ✓                       | ✗      |
| <b>Ekstrand et al (2011)</b> | "injury resulting from playing football and leading to a player being unable to fully participate in future training or match play (i.e., time loss injury)"                                 | Time-loss                               | ✓                        | ✗                       | ✗      |
| <b>Gaulrapp et al (2010)</b> | "an injury was defined as a specific and identifiable event in playing soccer that forced the player to miss the rest of at least 1 practice or game or sit out at least 1 practice or game" | Time-loss                               | ✓                        | ✗                       | ✗      |
| <b>Hägglund et al (2009)</b> | "a physical complaint resulting from football training or match"                                                                                                                             | Time-loss                               | ✓                        | ✗                       | ✗      |

|                                     |                                                                                                                                                                          |           |   |   |   |
|-------------------------------------|--------------------------------------------------------------------------------------------------------------------------------------------------------------------------|-----------|---|---|---|
|                                     | play leading to the player being unable to participate fully in at least one training session or match”                                                                  |           |   |   |   |
| <b>Tegnander et al (2008)</b>       | “the team physiotherapists recorded all injuries that caused the player to be unable to fully take part in the next match or training session (“time loss” injury)”      | Time-loss | ✓ | ✗ | ✗ |
| <b>Jacobson &amp; Tegner (2007)</b> | “as damage to the body sustained during practice or game session causing absence from at least the following practice and/or game session”                               | Time-loss | ✓ | ✗ | ✗ |
| <b>Faude et al (2005)</b>           | “any physical complaint associated with soccer (received during training or a match) that limits athletic participation for at least the day after the day of the onset” | Time-loss | ✓ | ✗ | ✗ |

**Table 3. Women's international football studies**

|                                                                      | Injury definition (from article)                                                                                                                                      | Authors' interpretation/classification of injury definition | Data reported in article |                         |                     |
|----------------------------------------------------------------------|-----------------------------------------------------------------------------------------------------------------------------------------------------------------------|-------------------------------------------------------------|--------------------------|-------------------------|---------------------|
|                                                                      |                                                                                                                                                                       |                                                             | Time-loss                | All Physical Complaints | Hybrid <sup>a</sup> |
| <b>Hägglund et al (2009)<br/>U-19 European<br/>Championship 2006</b> | "injury resulting from playing football and leading to a player being unable to fully participate in future training or match play (i.e., time loss injury).          | Time-loss                                                   | ✓                        | ✗                       | ✗                   |
| <b>Hägglund et al (2009)<br/>U-19 European<br/>Championship 2007</b> | "injury resulting from playing football and leading to a player being unable to fully participate in future training or match play (i.e., time loss injury).          | Time-loss                                                   | ✓                        | ✗                       | ✗                   |
| <b>Hägglund et al (2009)<br/>U-19 European<br/>Championship 2008</b> | "injury resulting from playing football and leading to a player being unable to fully participate in future training or match play (i.e., time loss injury).          | Time-loss                                                   | ✓                        | ✗                       | ✗                   |
| <b>Junge et al (2004)<br/>World Cup 1999</b>                         | "an injury was defined as any physical complaint arising during the match regardless of the consequences with respect to subsequent absence from matches or training" | All physical complaints                                     | ✗                        | ✓                       | ✗                   |

|                                                                       |                                                                                                                                                                                                                        |                         |   |   |   |
|-----------------------------------------------------------------------|------------------------------------------------------------------------------------------------------------------------------------------------------------------------------------------------------------------------|-------------------------|---|---|---|
| <b>Junge &amp; Dvorak (2007)<br/>World Cup 2003</b>                   | “an injury was defined as any physical complaint during a match which received medical attention from the team doctor, regardless of the consequences with respect to absence from the rest of the match or training”  | All physical complaints | x | ✓ | x |
| <b>Junge et al (2004)<br/>Olympic Games 2000</b>                      | “an injury was defined as any physical complaint arising during the match regardless of the consequences with respect to subsequent absence from matches or training”                                                  | All physical complaints | x | ✓ | x |
| <b>Junge et al (2006)<br/>Olympic Games 2004</b>                      | “an injury was defined as any physical complaint incurred during the match that received medical attention from the team physician, regardless of the consequences with respect to absence from the match or training” | All physical complaints | x | ✓ | x |
| <b>Junge &amp; Dvorak (2007)<br/>U-19 World<br/>Championship 2002</b> | “an injury was defined as any physical complaint during a match which received medical attention from the team doctor, regardless of the consequences with respect to absence from                                     | All physical complaints | x | ✓ | x |

|                                                                       |                                                                                                                                                                                                                       |                         |   |   |   |
|-----------------------------------------------------------------------|-----------------------------------------------------------------------------------------------------------------------------------------------------------------------------------------------------------------------|-------------------------|---|---|---|
|                                                                       | the rest of the match or training”                                                                                                                                                                                    |                         |   |   |   |
| <b>Junge &amp; Dvorak (2007)<br/>U-19 World<br/>Championship 2004</b> | “an injury was defined as any physical complaint during a match which received medical attention from the team doctor, regardless of the consequences with respect to absence from the rest of the match or training” | All physical complaints | ✘ | ✔ | ✘ |
| <b>Junge &amp; Dvorak (2007)<br/>U-20 World<br/>Championship 2006</b> | “an injury was defined as any physical complaint during a match which received medical attention from the team doctor, regardless of the consequences with respect to absence from the rest of the match or training” | All physical complaints | ✘ | ✔ | ✘ |
| <b>Waldén et al (2007)<br/>European<br/>Championship 2005</b>         | “time loss injury was defined as an incident occurring during scheduled training sessions or matches causing the player to miss the next training session or match”                                                   | Time-loss               | ✔ | ✘ | ✘ |
