# Supplementary material
Source: HighWire-hosted journal article supplement (https://bjsm.bmj.com/content/57/8/471)

## Supplementary File 4.

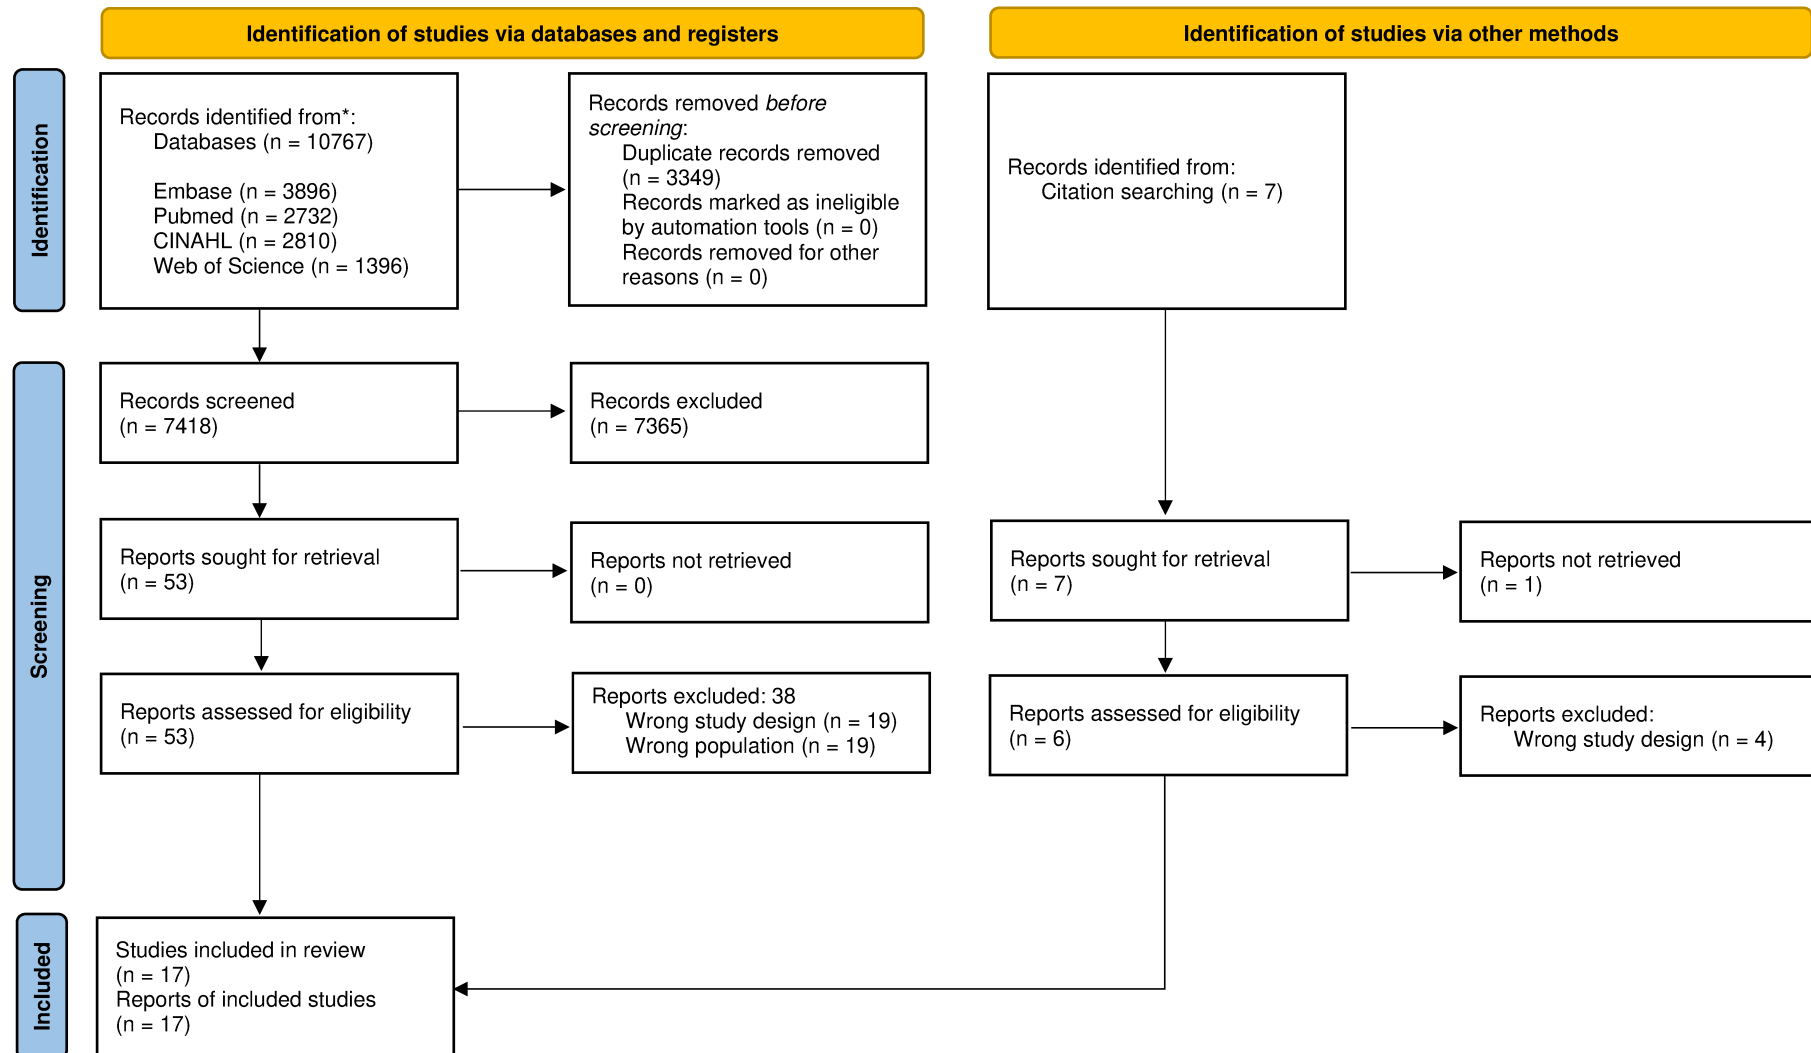

Supplement: inline-supplementary-material-4 [file inline-supplementary-material-4.pdf]
